# Supplementary figures and images for: YY1TargetDB: an integral information resource for Yin Yang 1 target loci
Source: Oxford University Press journal article supplement (doi:10.1093/database/bat007), 2013-01-01

Supplementary Figure 1. YY1TargetDB database schema

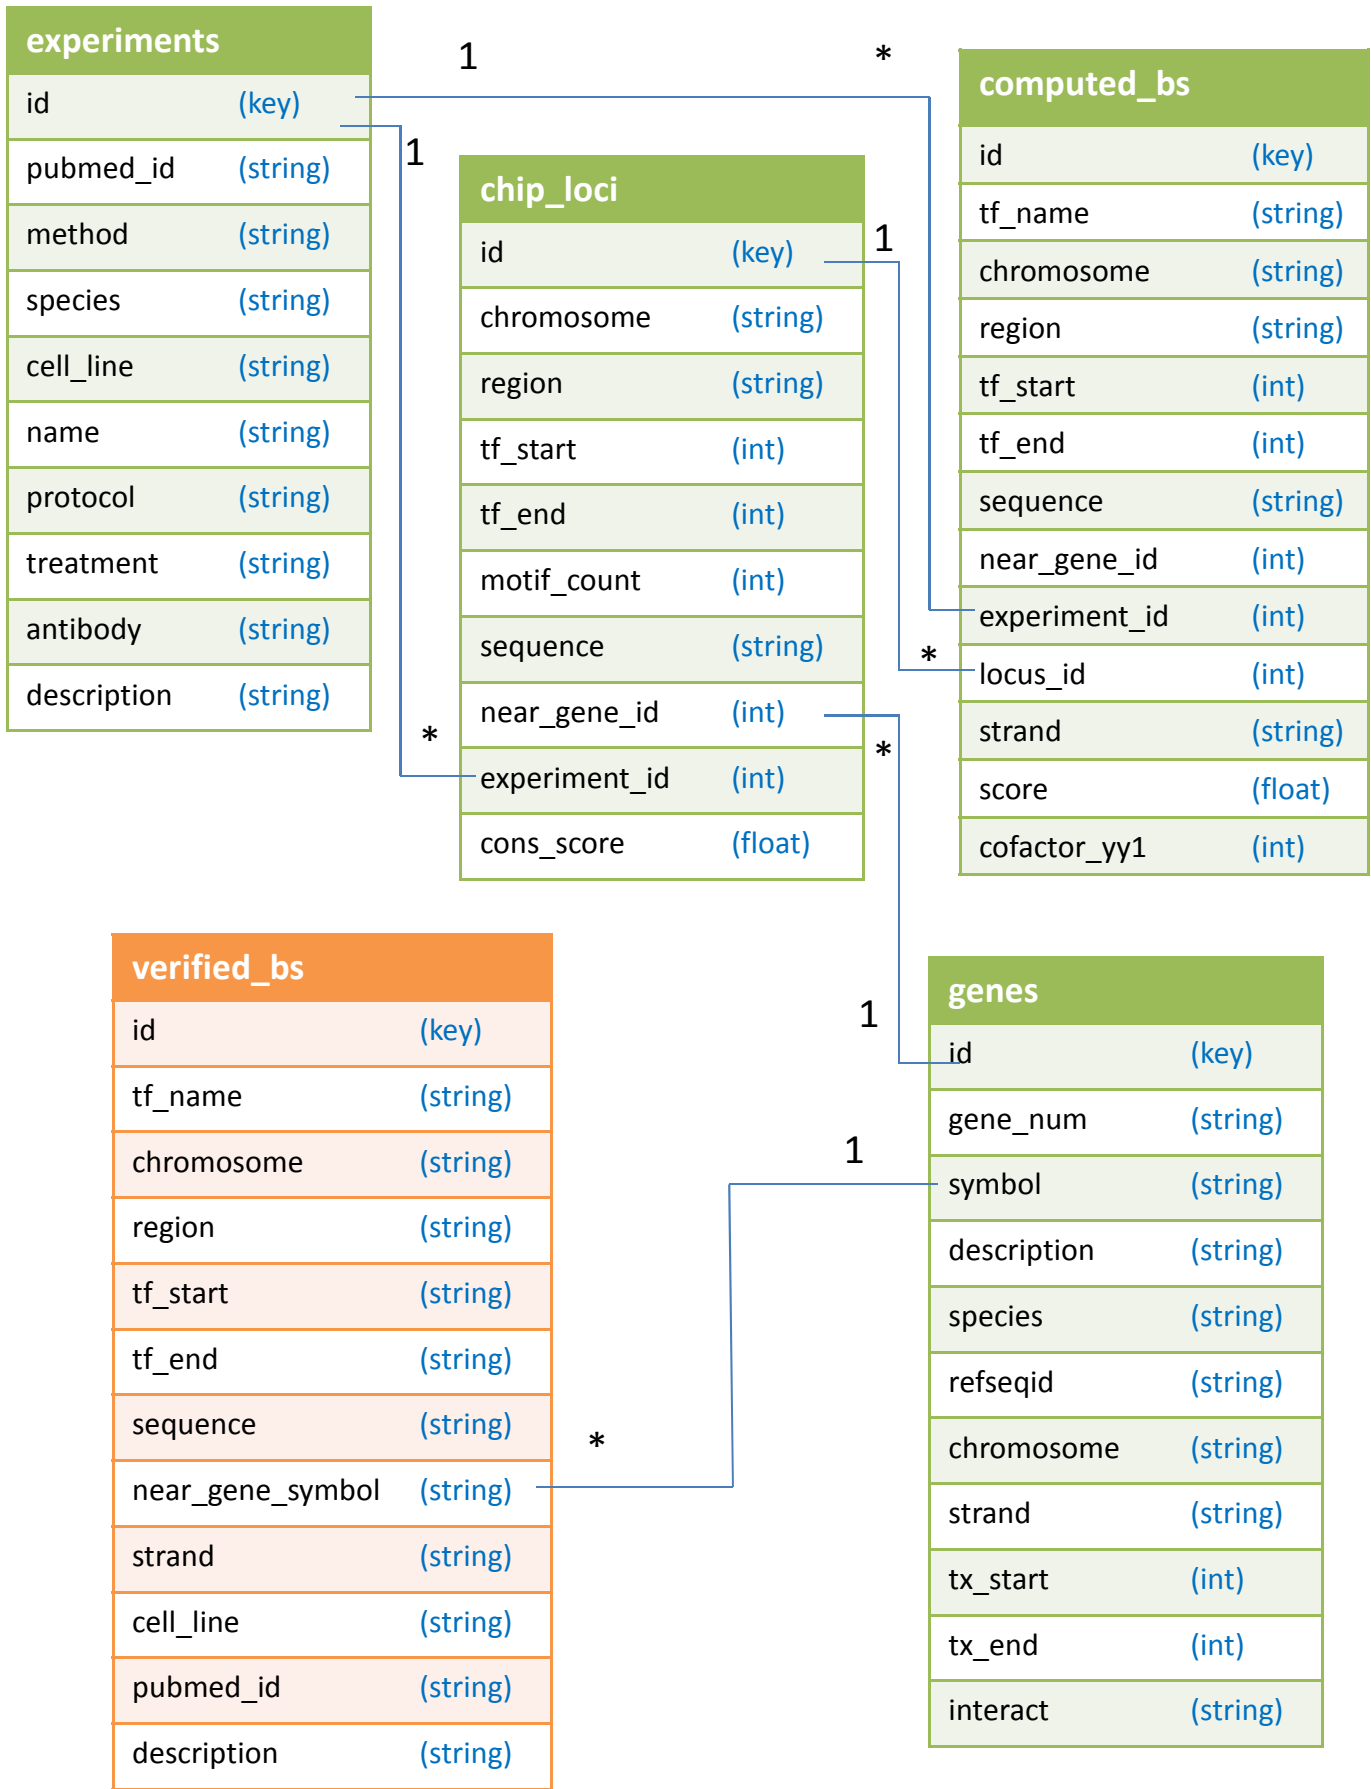

Supplement: bat007_Supplementary_Data.zip [file bat007_Supplementary_Data.zip]
